# Supplementary material for: Evaluation of the effect of a cell penetrating peptide (TAT) towards tailoring the targeting efficacy and tumor uptake of porphyrin
Source: Royal Society of Chemistry journal article supplement (doi:10.1039/d2md00097k), 2022-01-01
Supplement: d2md00097k1.pdf [file d2md00097k1.pdf]

**Evaluation of the effect of cell penetrating peptide (TAT) towards tailoring the targeting efficacy and tumor uptake of porphyrin**

Mohini Guleria<sup>a,b</sup>, Shishu K. Suman<sup>a,b</sup>, Naveen Kumar<sup>a,b</sup>, Amit K. Sharma<sup>a,b</sup>,  
JeyachitraAmirdhanayagam<sup>a</sup>, Haladhar D. Sarma<sup>c</sup>, DrishtySatpati<sup>a,b</sup>, Tapas Das<sup>\*,a,b</sup>

*<sup>a</sup>Radiopharmaceuticals Division, Bhabha Atomic Research Centre,*

*Trombay, Mumbai - 400085, India*

*<sup>b</sup>Homi Bhabha National Institute, Anushaktinagar, Mumbai - 400094, India*

*<sup>c</sup>Radiation Biology and Health Sciences Division, Bhabha Atomic Research Centre,*

*Trombay, Mumbai - 400085, India*

| <b>Sr.No.</b> | <b>Title</b>                                                                                                                                                                                                                                                         | <b>Page no.</b> |
|---------------|----------------------------------------------------------------------------------------------------------------------------------------------------------------------------------------------------------------------------------------------------------------------|-----------------|
| <b>1</b>      | Fig. S1: FT-IR spectrum of compound <b>1</b>                                                                                                                                                                                                                         | 2               |
| <b>2</b>      | Fig. S2: Mass spectrum (ESI-MS) of compound <b>1</b>                                                                                                                                                                                                                 | 2               |
| <b>3</b>      | Fig. S3: FT-IR spectrum of compound <b>2</b>                                                                                                                                                                                                                         | 3               |
| <b>4</b>      | Fig. S4: Mass spectrum (MALDI-TOF) of compound <b>2</b>                                                                                                                                                                                                              | 3               |
| <b>5</b>      | Fig. S5: Mass spectrum (MALDI-TOF) of compound <b>3</b>                                                                                                                                                                                                              | 4               |
| <b>6</b>      | Fig. S6: Images of well plate showcasing the decline in intensity upon light exposure for compound <b>2</b> and <b>3</b> at two different concentrations viz. 0.5 and 1 $\mu$ M in A549 cells                                                                        | 5               |
| <b>7</b>      | Fig. S7: Fluorescence images: (a) of compound <b>2</b> (UTriCOOHPhOH) and (b) compound <b>3</b> (UTriCOOHPhO-TAT), acquired at 1 $\mu$ M concentration in A549 cell lines                                                                                            | 6               |
| <b>8</b>      | Fig. S8: Absorption spectrum and emission spectra (inset: $\lambda_{\text{excitation}} = 423$ nm) of compound <b>2</b>                                                                                                                                               | 7               |
| <b>9</b>      | Fig. S9: Absorption and emission spectra (inset: $\lambda_{\text{excitation}} = 422$ nm) of compound <b>3</b>                                                                                                                                                        | 7               |
| <b>10</b>     | Fig. S10: UV-Vis spectra of (a) UTriCOOHPhOH and, (b) UTriCOOHPhO-TAT, respectively (red color) overlaid with their respective <sup>nat</sup> Ga-complexes (black color) exhibiting the reduction in number of Q-bands upon metal complexation in the porphyrin core | 8               |

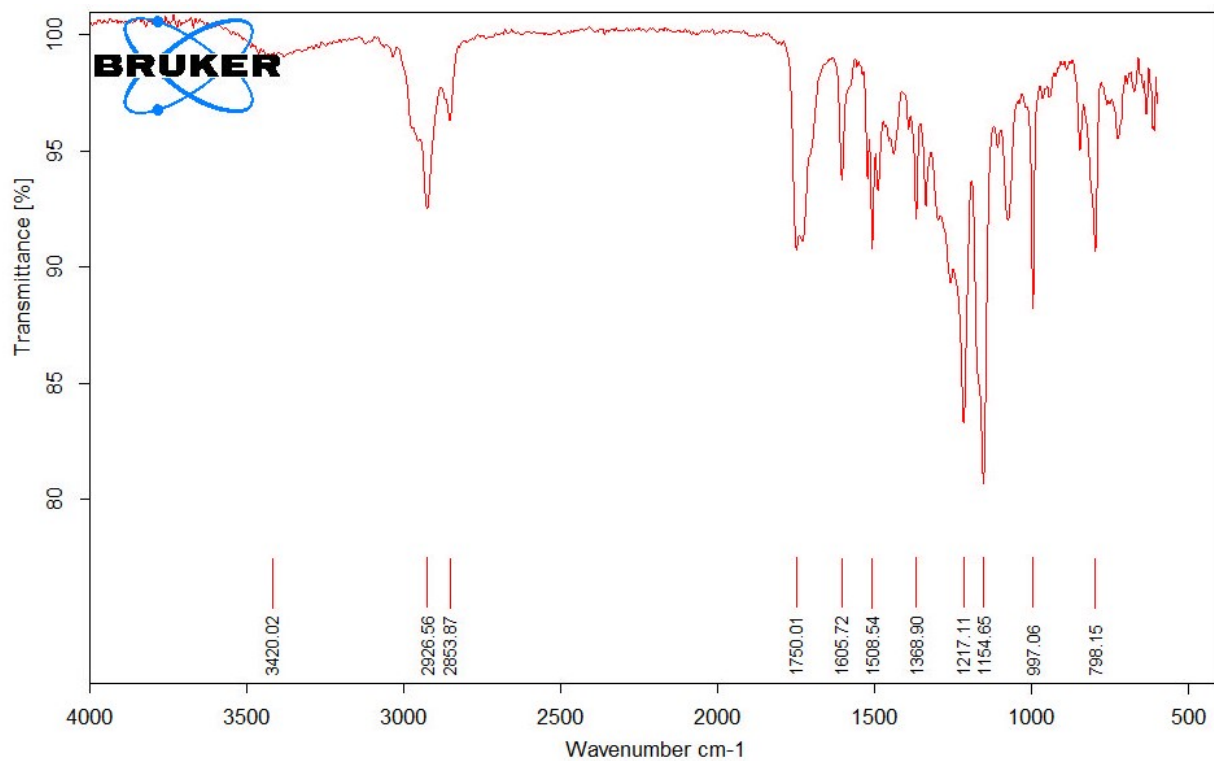

**Fig. S1: FT-IR spectrum of compound 1**

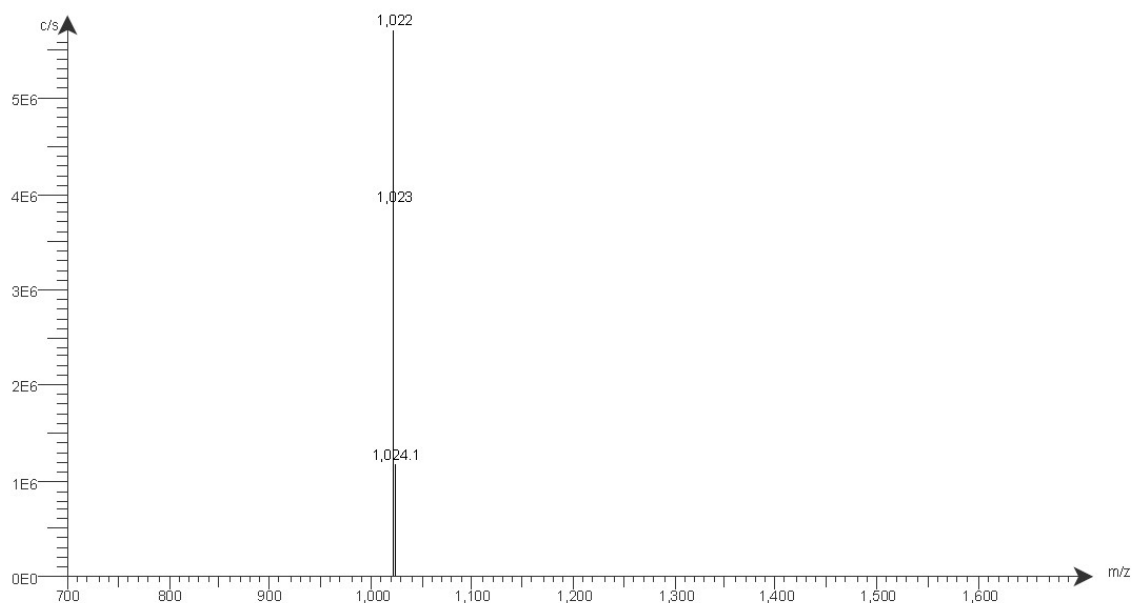

**Fig. S2: Mass spectrum (ESI-MS) of compound 1**

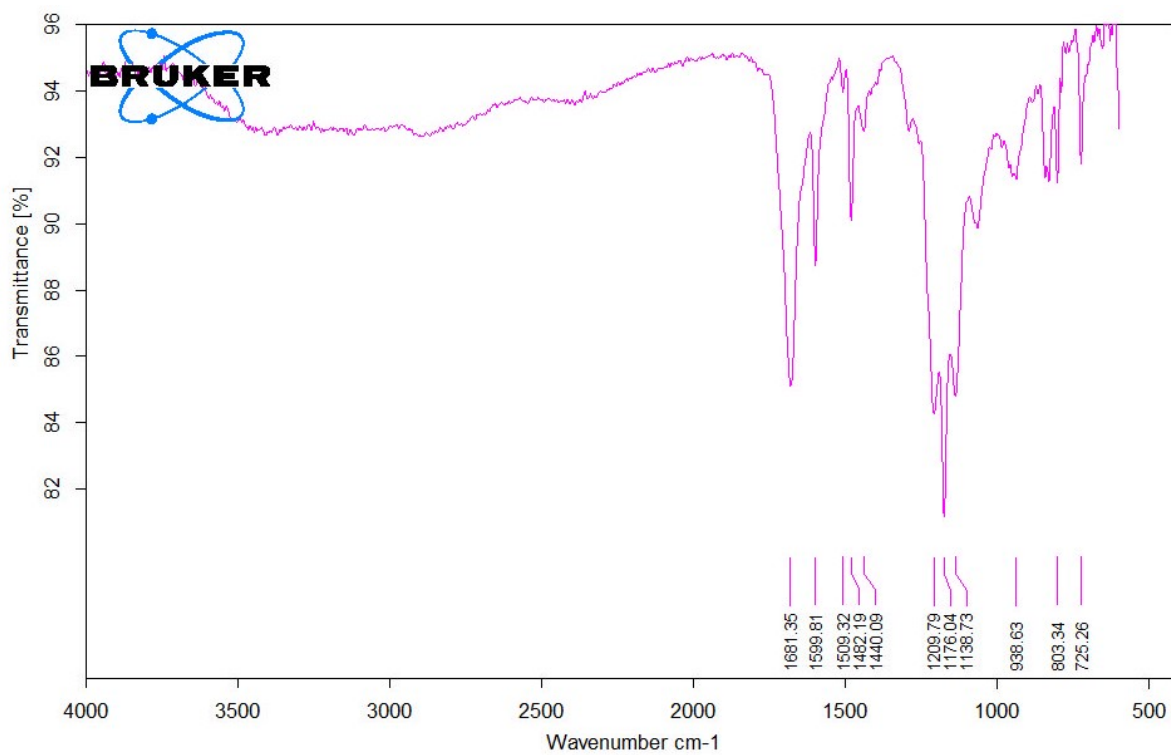

**Figure S3: FT-IR spectrum of compound 2**

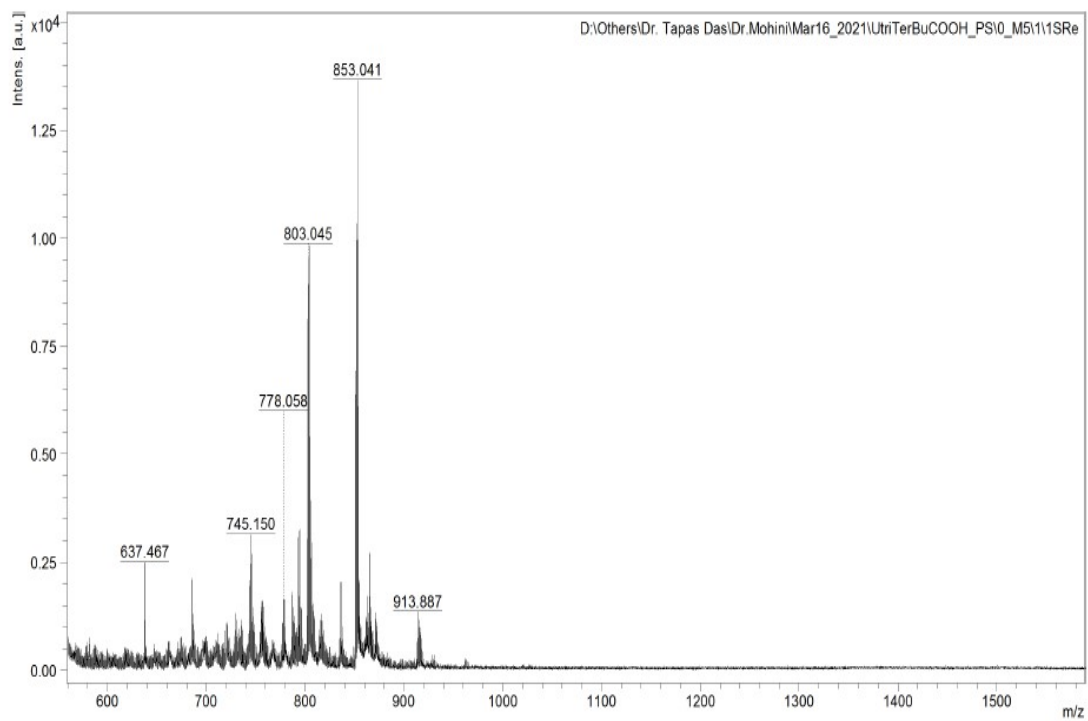

**Figure S4: Mass spectrum (MALDI-TOF) of compound 2**

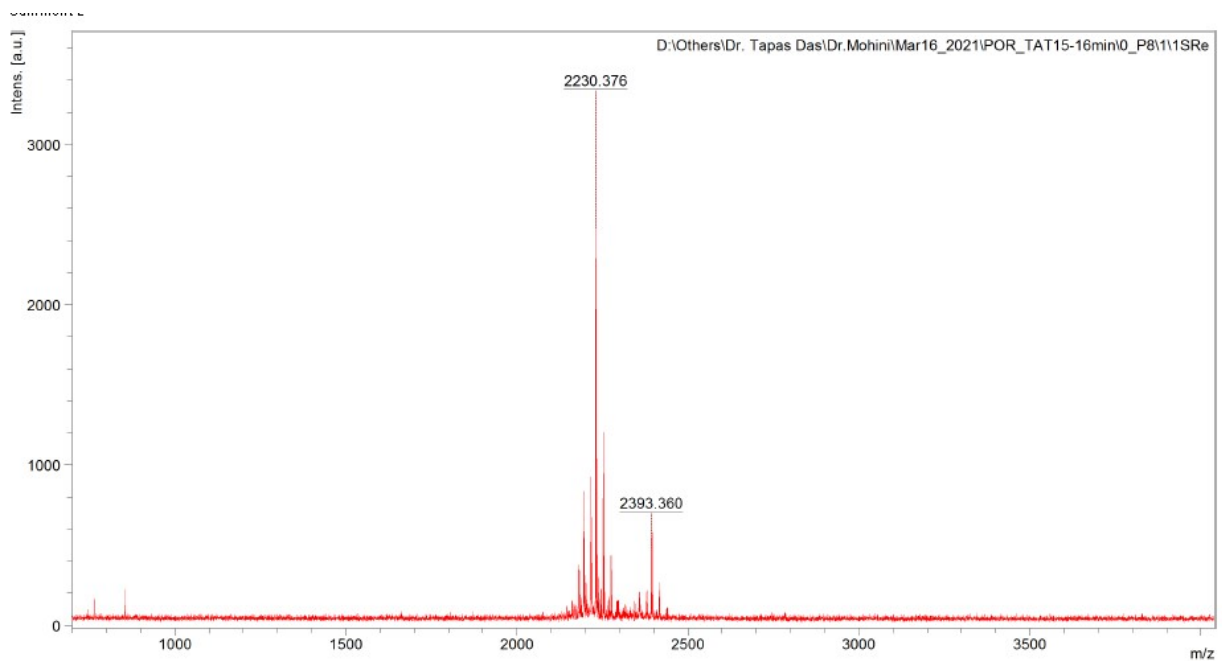

**Figure S5: Mass spectrum (MALDI-TOF) of compound 3**

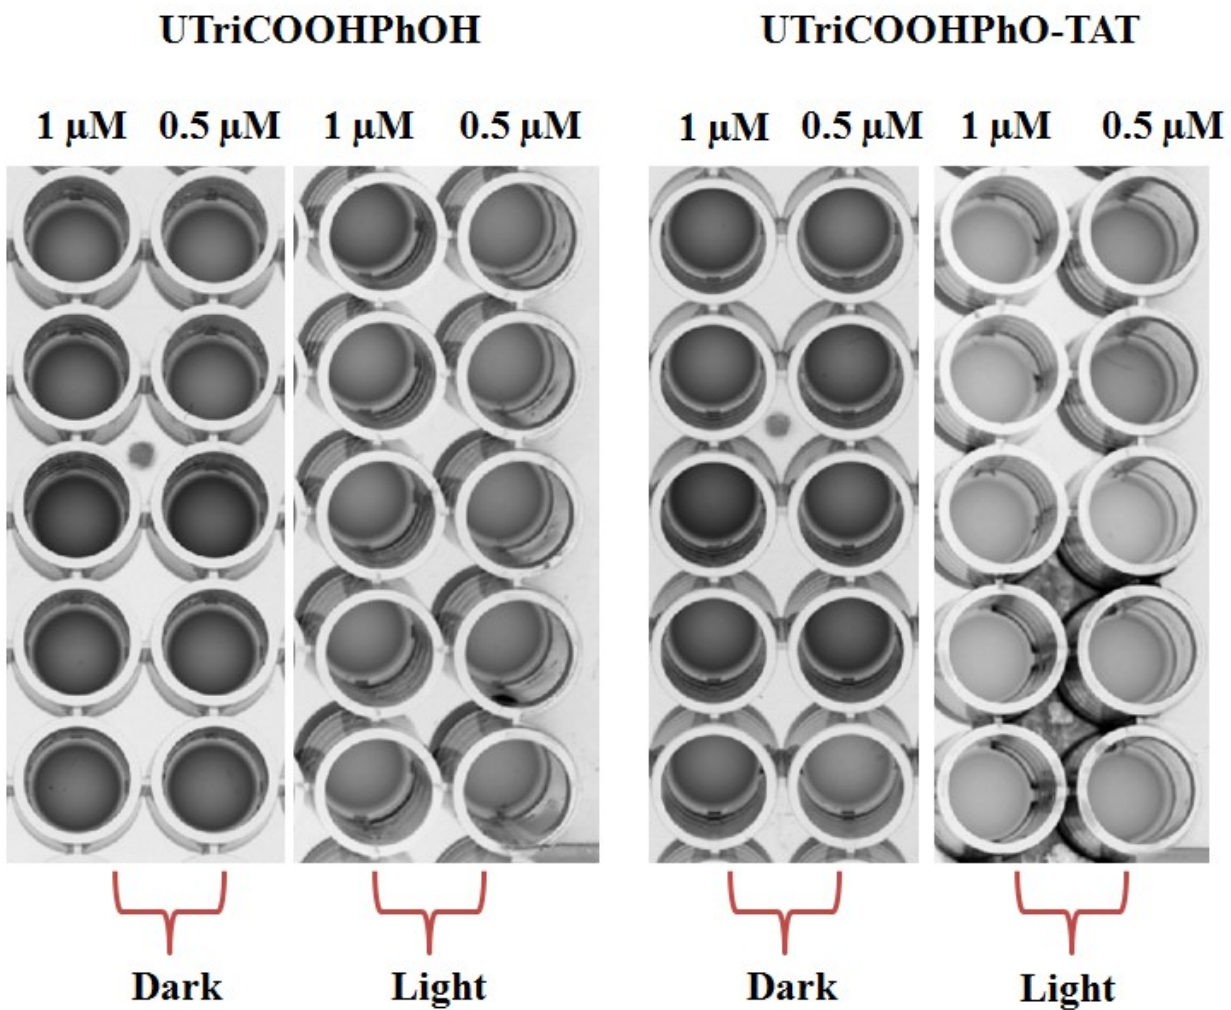

**Figure S6: Images of well plate showcasing the decline in intensity (dark grey to light grey) upon light exposure for compound 2 and 3 in A549 cells, at two different concentrations viz. 0.5 and 1  $\mu$ M.**

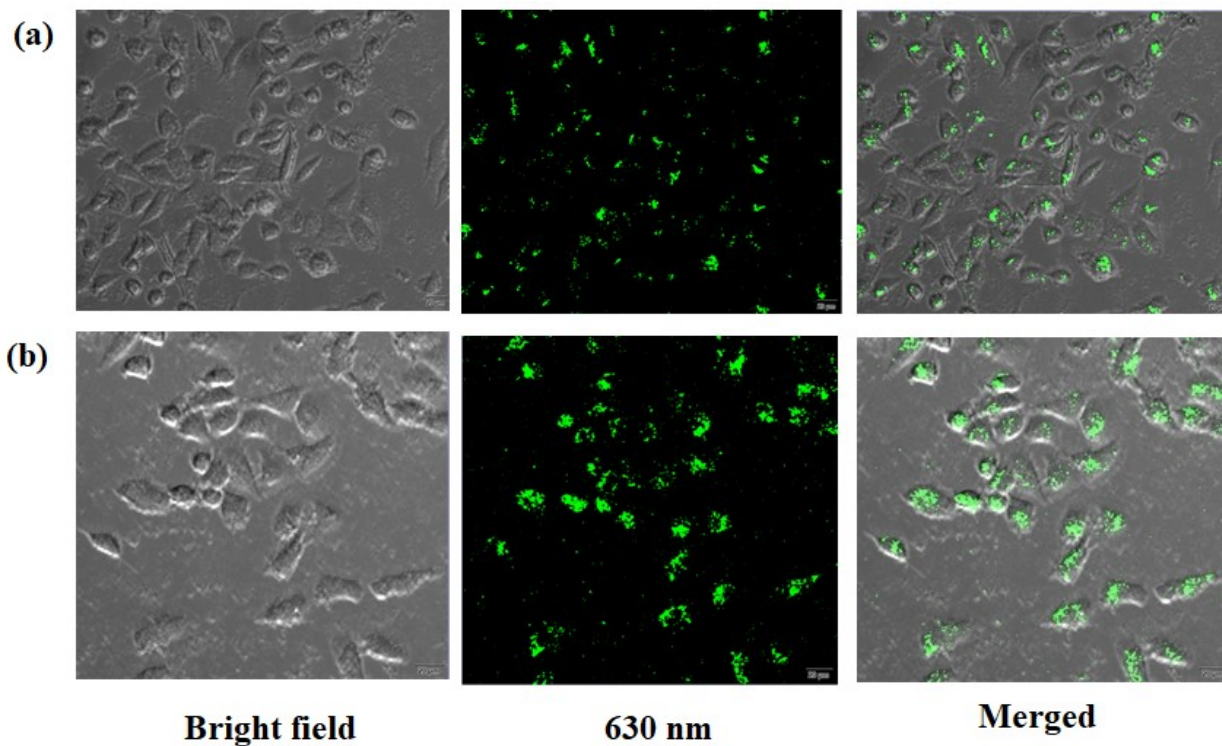

**Figure S7: Fluorescence images: (a) of compound 2 (UTriCOOHPhOH) and (b) compound 3 (UTriCOOHPhO-TAT),acquired at 1  $\mu$ M concentration in A549 cell lines**

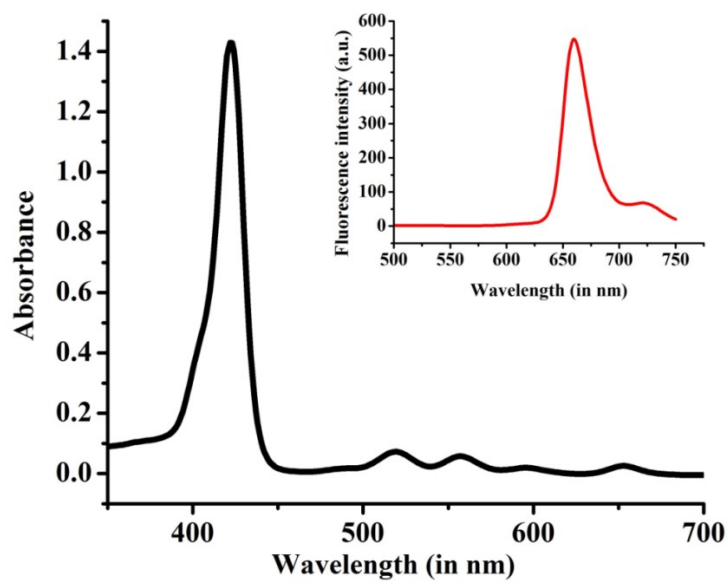

Figure S8: Absorption spectrum and emission spectra (inset:  $\lambda_{\text{excitation}} = 423 \text{ nm}$ ) of compound 2

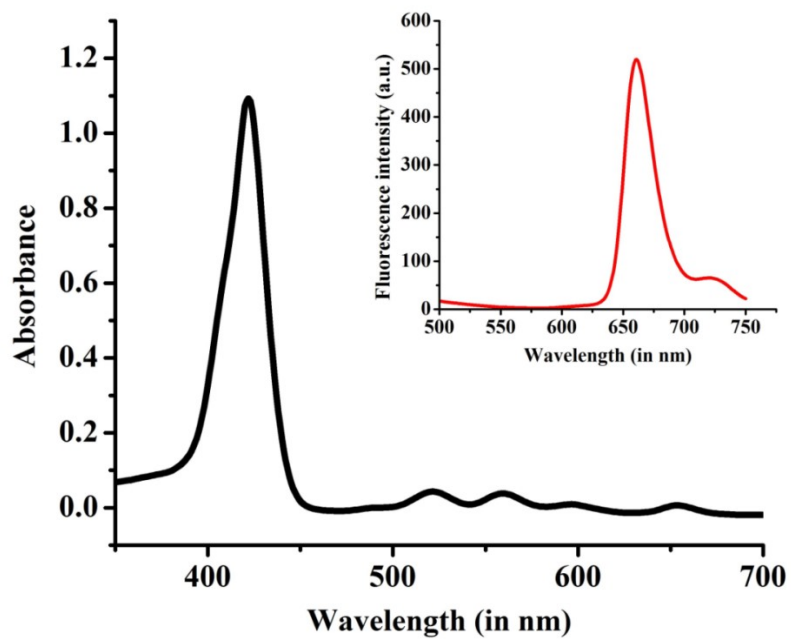

Figure S9: Absorption and emission spectra (inset:  $\lambda_{\text{excitation}} = 422 \text{ nm}$ ) of compound 3

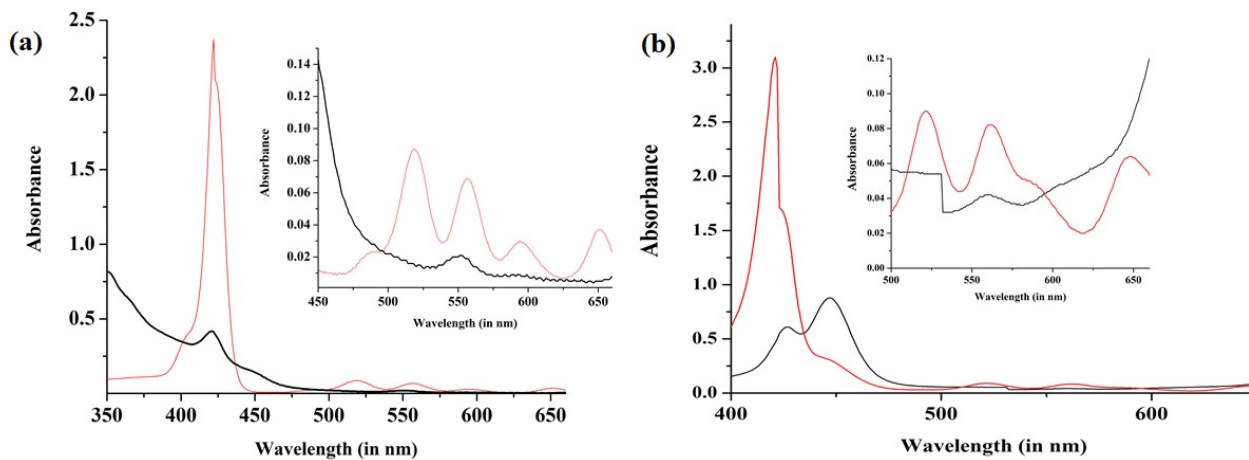

Figure S10: UV-Vis spectra of (a) UTriCOOHPhOH and, (b) UTriCOOHPhO-TAT, respectively (red color) overlaid with their respective  $^{nat}\text{Ga}$ -complexes (black color) exhibiting the reduction in number of Q-bands upon metal complexation in the porphyrin core
